# Supplementary material for: Conformational preferences of the flexible galactofuranose sugar in gas-phase
Source: Royal Society of Chemistry journal article supplement (doi:10.1039/d3cp01671d), 2023-01-01
Supplement: d3cp01671d1.pdf [file d3cp01671d1.pdf]

## Supporting information

### Conformational preferences of the flexible galactofuranose sugar in gas-phase

Oznur Yeni,<sup>a</sup> Abdul-Rahman Allouche,<sup>a</sup> Laurent Legentil,<sup>b</sup> Vincent Ferrières,<sup>b</sup> and Isabelle Compagnon<sup>\*a</sup>

<sup>a</sup> Univ Lyon, Université Claude Bernard Lyon 1, CNRS, Institut Lumière Matière, Villeurbanne, France

<sup>b</sup> Univ. Rennes, Ecole Nationale Supérieure de Chimie de Rennes, F-35000 Rennes, France.

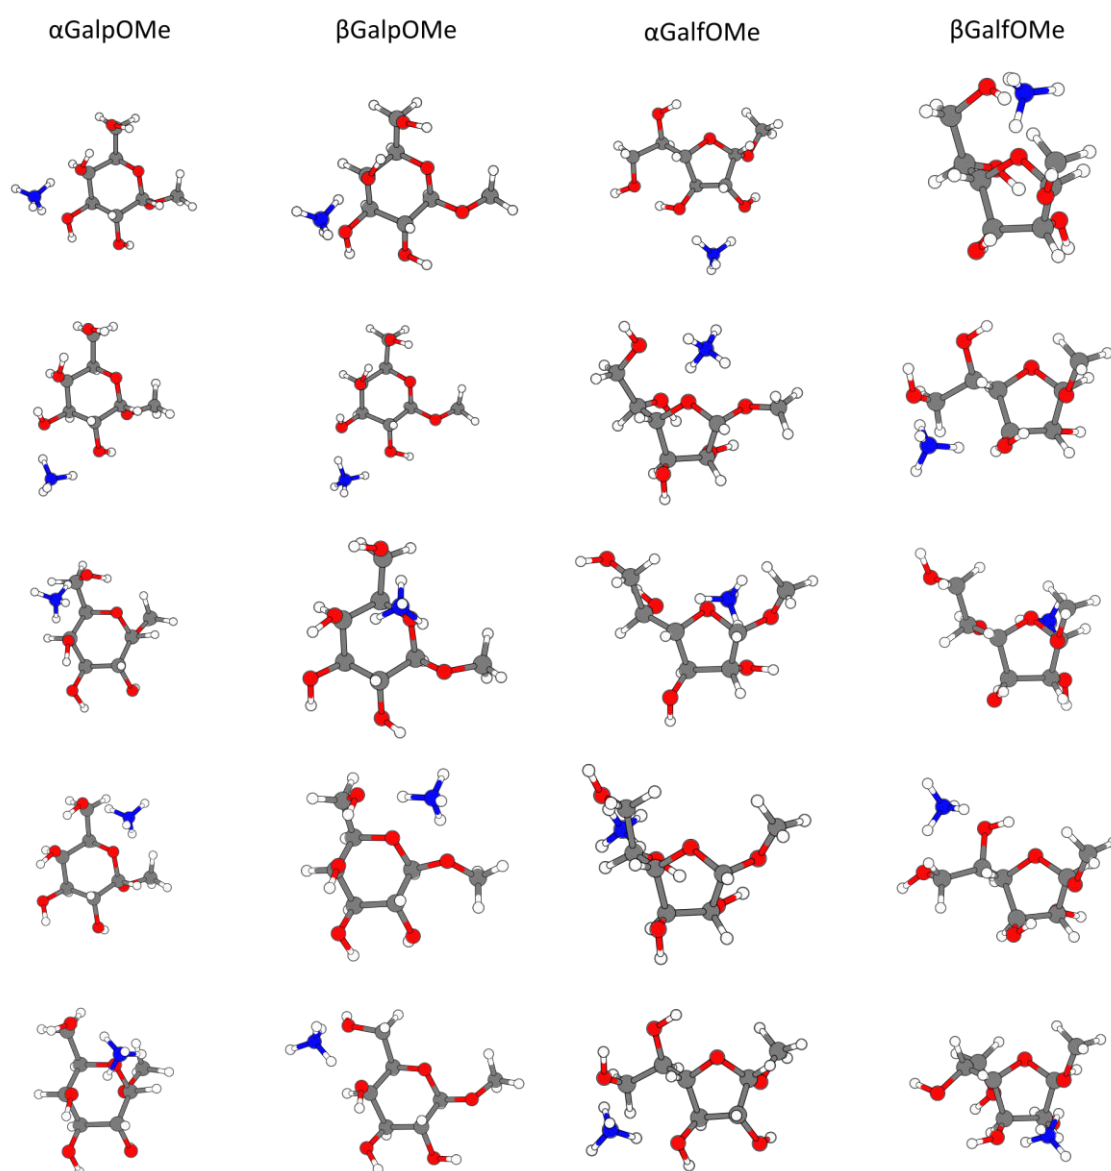

Figure S1 Examples of conformers of  $\alpha$ GalpOMe,  $\beta$ GalpOMe,  $\alpha$ GalfOMe and  $\beta$ GalfOMe with different  $\text{NH}_4^+$  position.

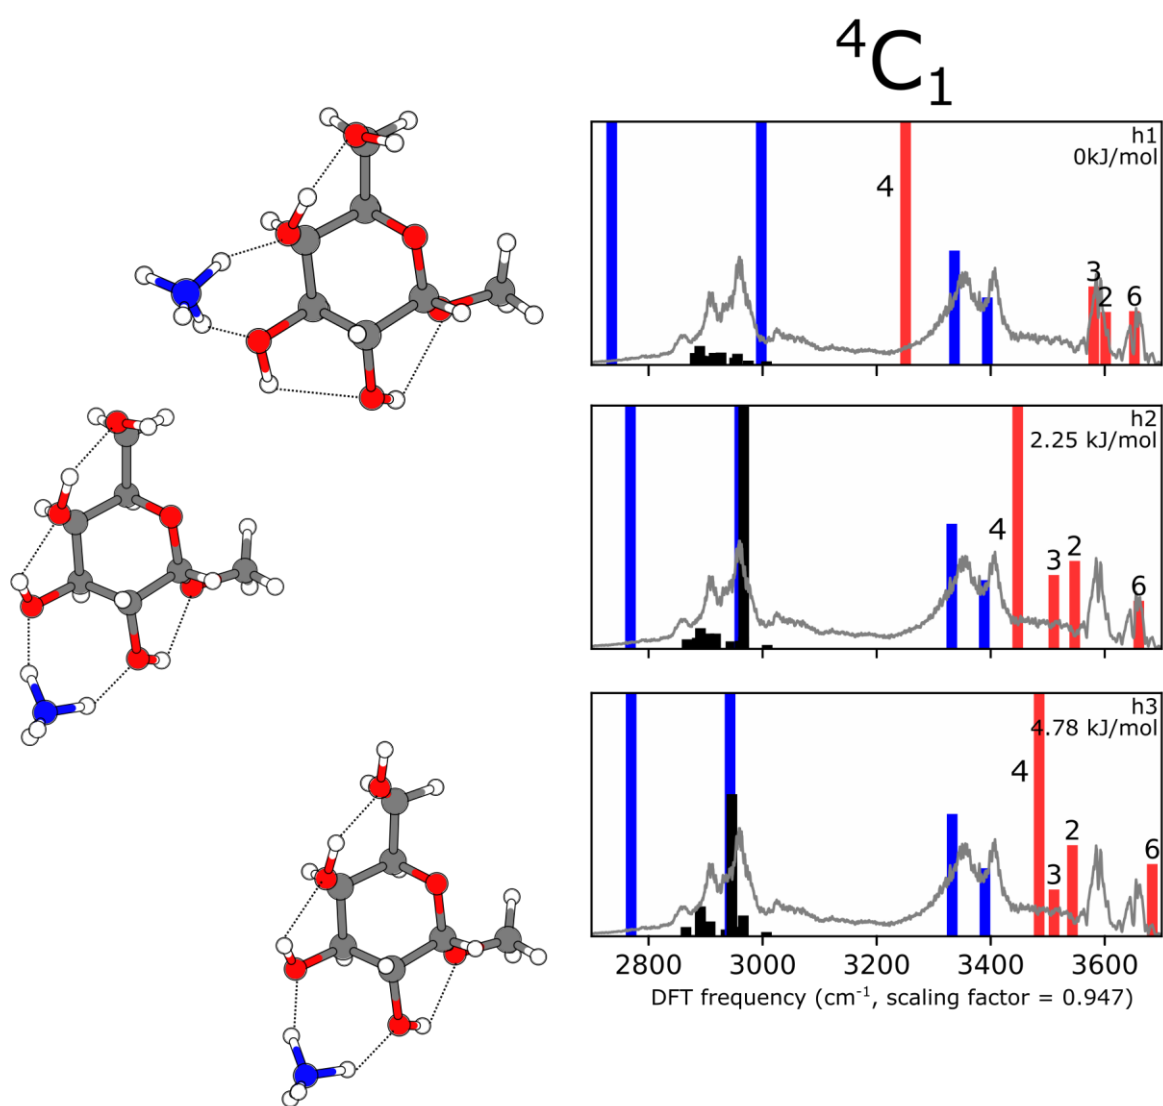

Figure S2 Structures of the most stable conformations for  $\alpha\text{GalpOMe}$  and their OH (red), NH (blue) and CH (black) vibrational modes compared to the experimental spectrum (grey). The labels indicate the ring OH position. The relative energies are given in reference to the most stable form h1 (only conformers with relative energy under 8.3 kJ/mol are represented). Hydrogen bonds are represented by dotted lines.

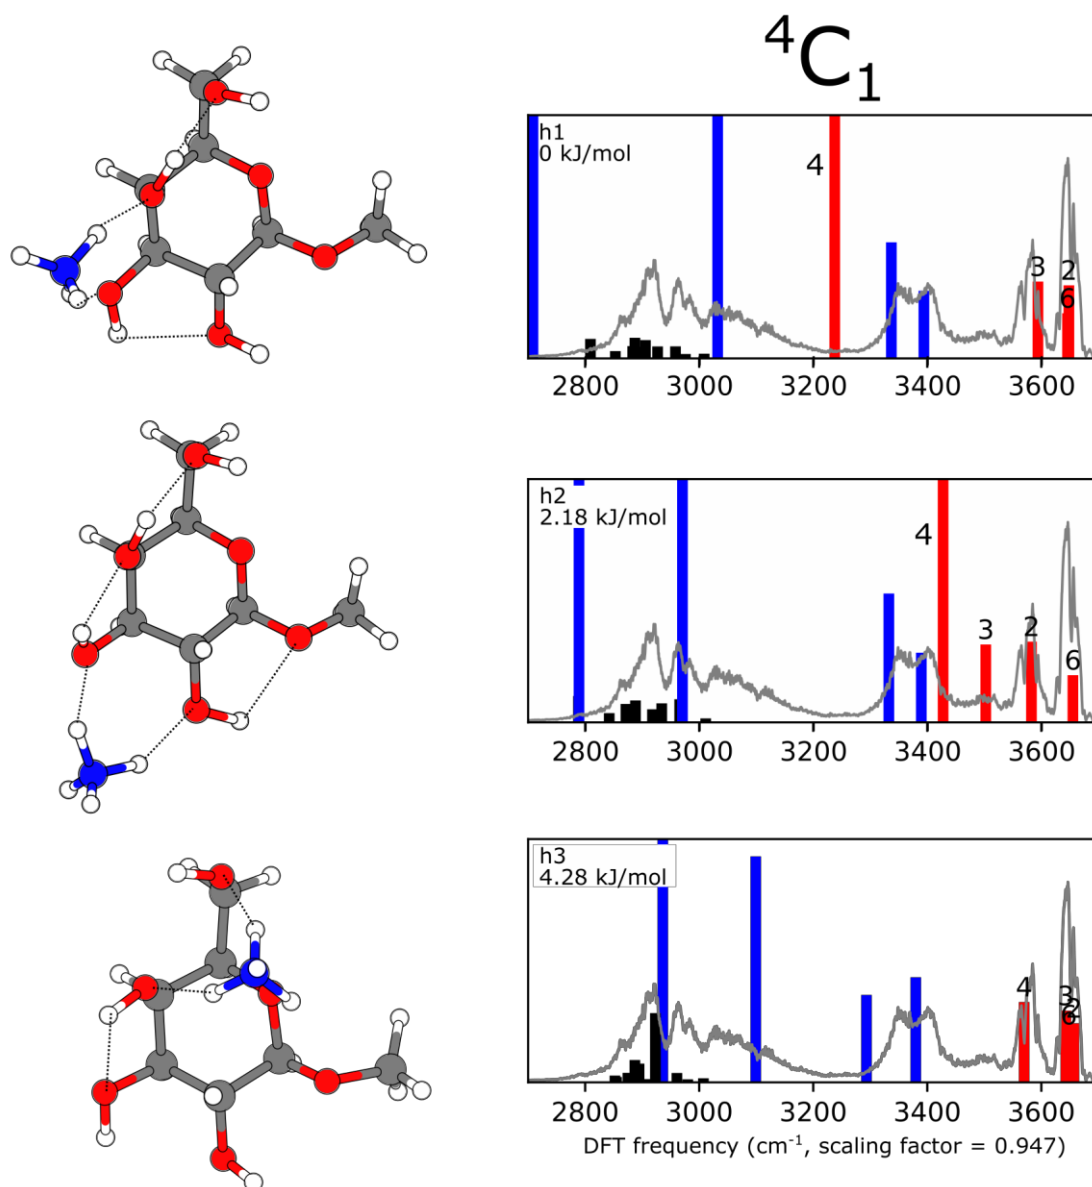

Figure S3 Structures of the most stable conformations for  $\beta$ GalpOMe and their OH (red), NH (blue) and CH (black) vibrational modes compared to the experimental spectrum (grey). The labels indicate the ring OH position. The relative energies are given in reference to the most stable form h1 (only conformers with relative energy under 8.3 kJ/mol are represented). Hydrogen bonds are represented by dotted lines.

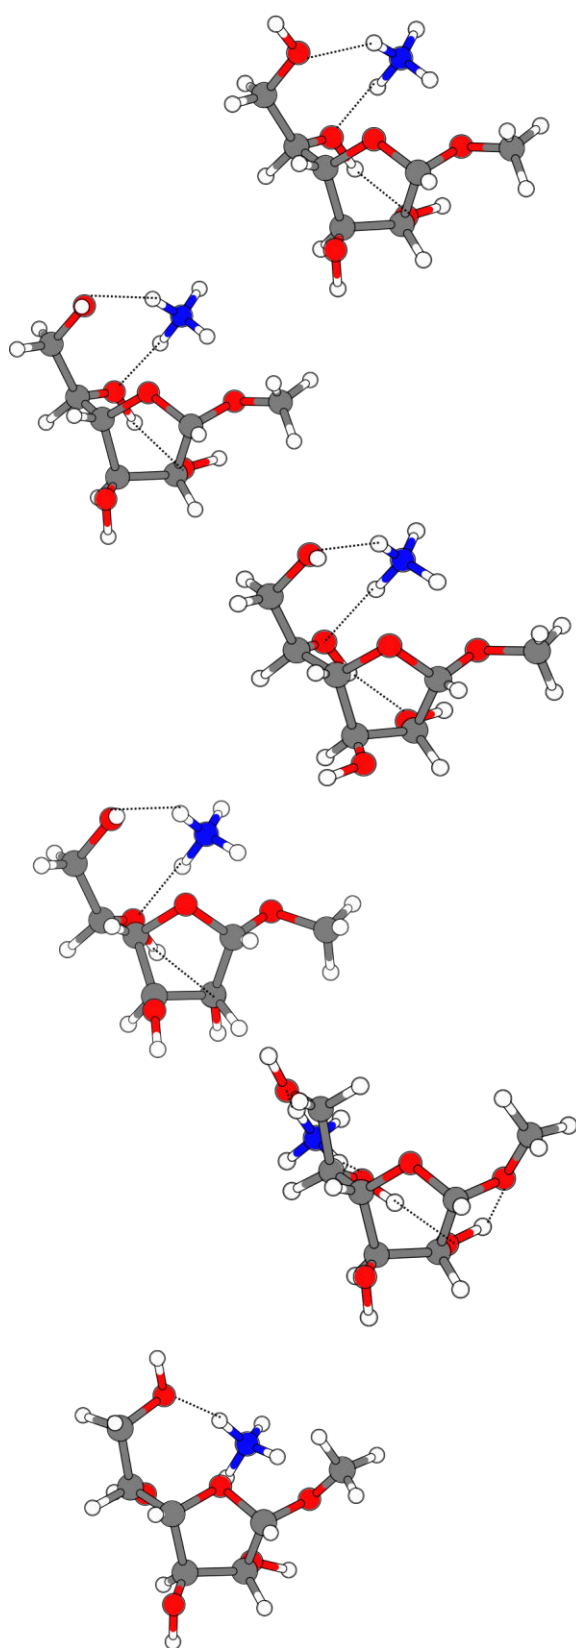

$E_2$

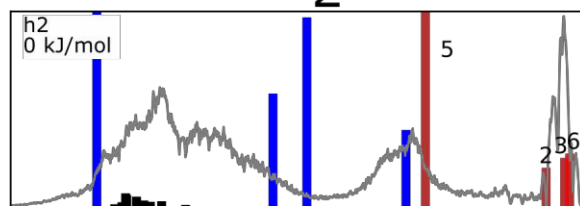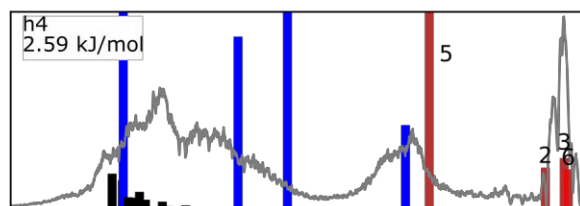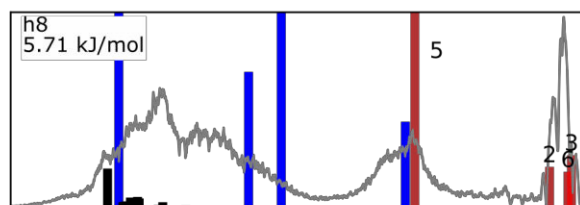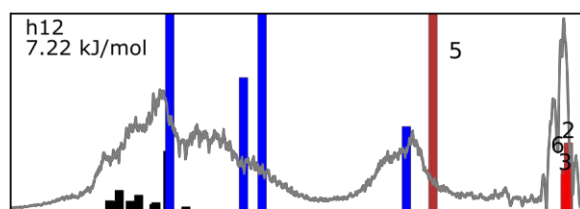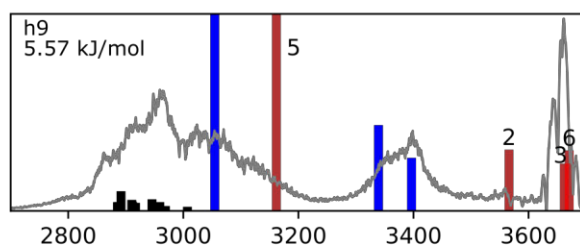

$^1E$

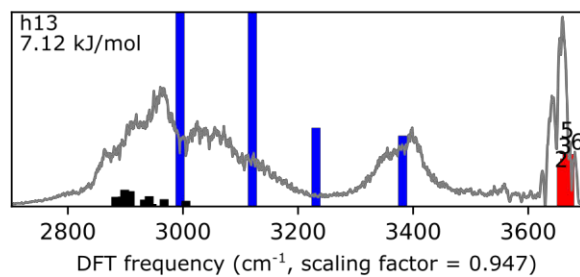

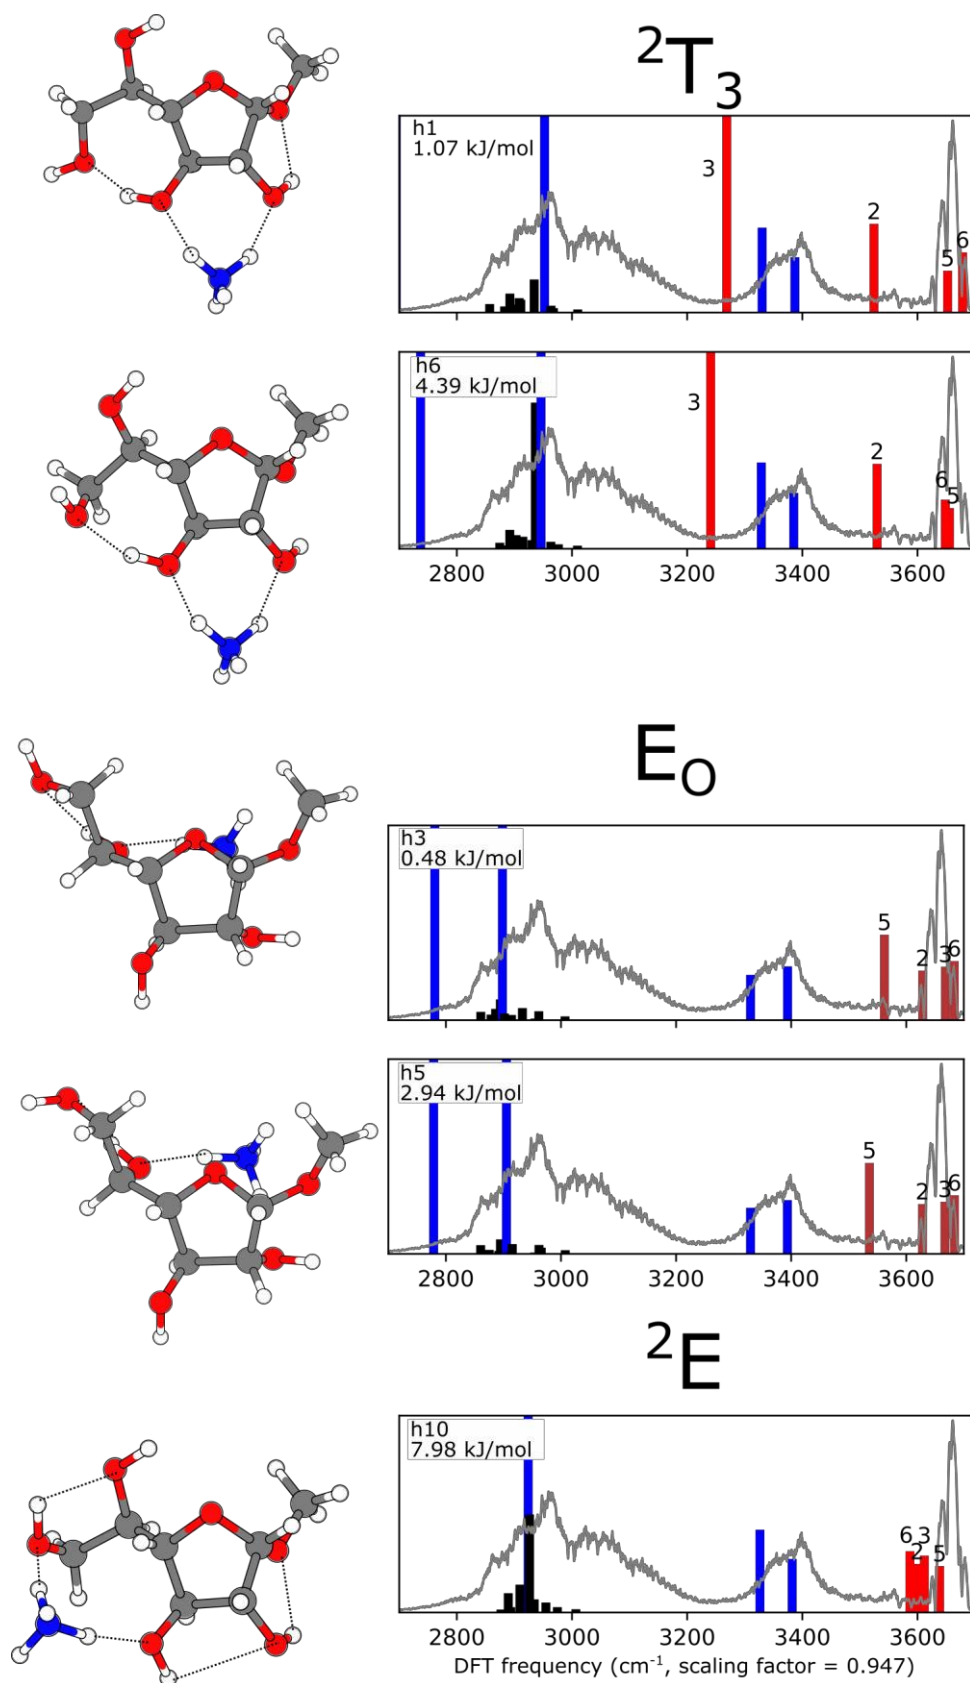

Figure S4 Structures of the most stable conformations for  $\alpha\text{GalfOMe}$ , gathered according to their geometry type, and their OH (red), NH (blue) and CH (black) vibrational modes compared to the experimental spectrum (grey). The labels indicate the ring OH position. The relative energies are given in reference to the most stable form h1 (only conformers with relative energy under 8.3 kJ/mol are represented). Hydrogen bonds are represented by dotted lines.

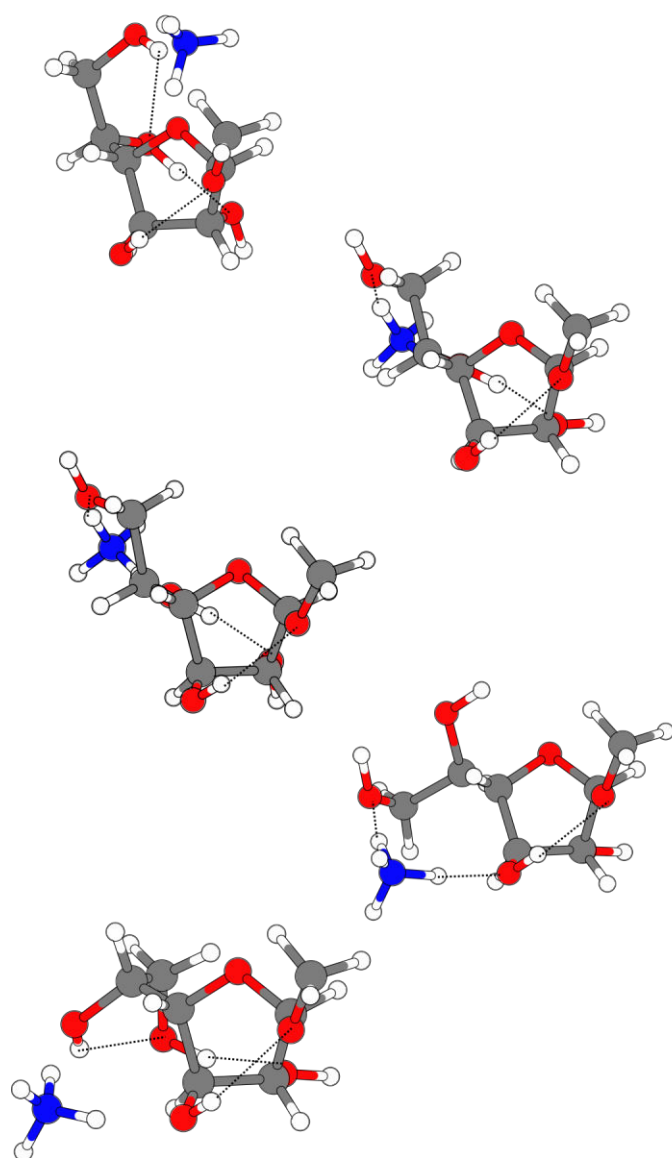
 ${}^1T_2$ 
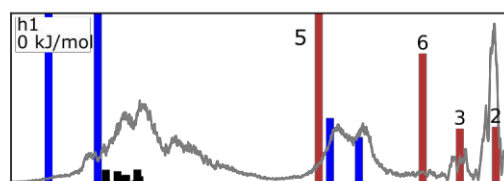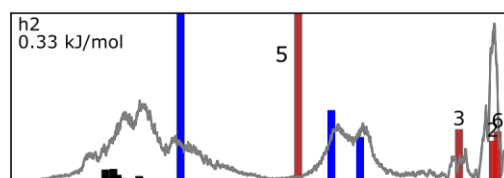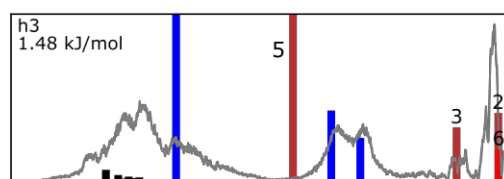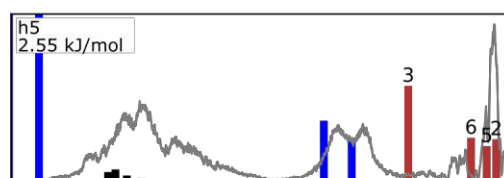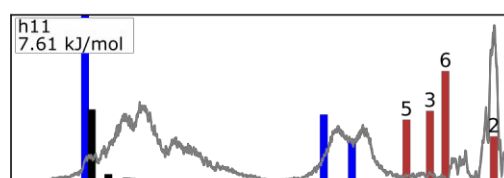
 ${}^1E$ 
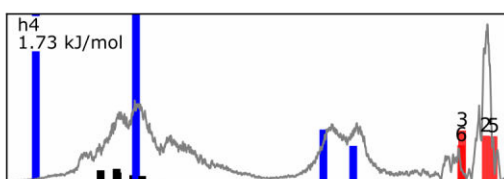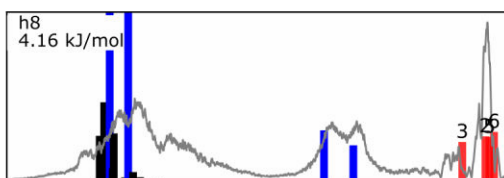

DFT frequency ( $\text{cm}^{-1}$ , scaling factor = 0.947)

$^1T_0$

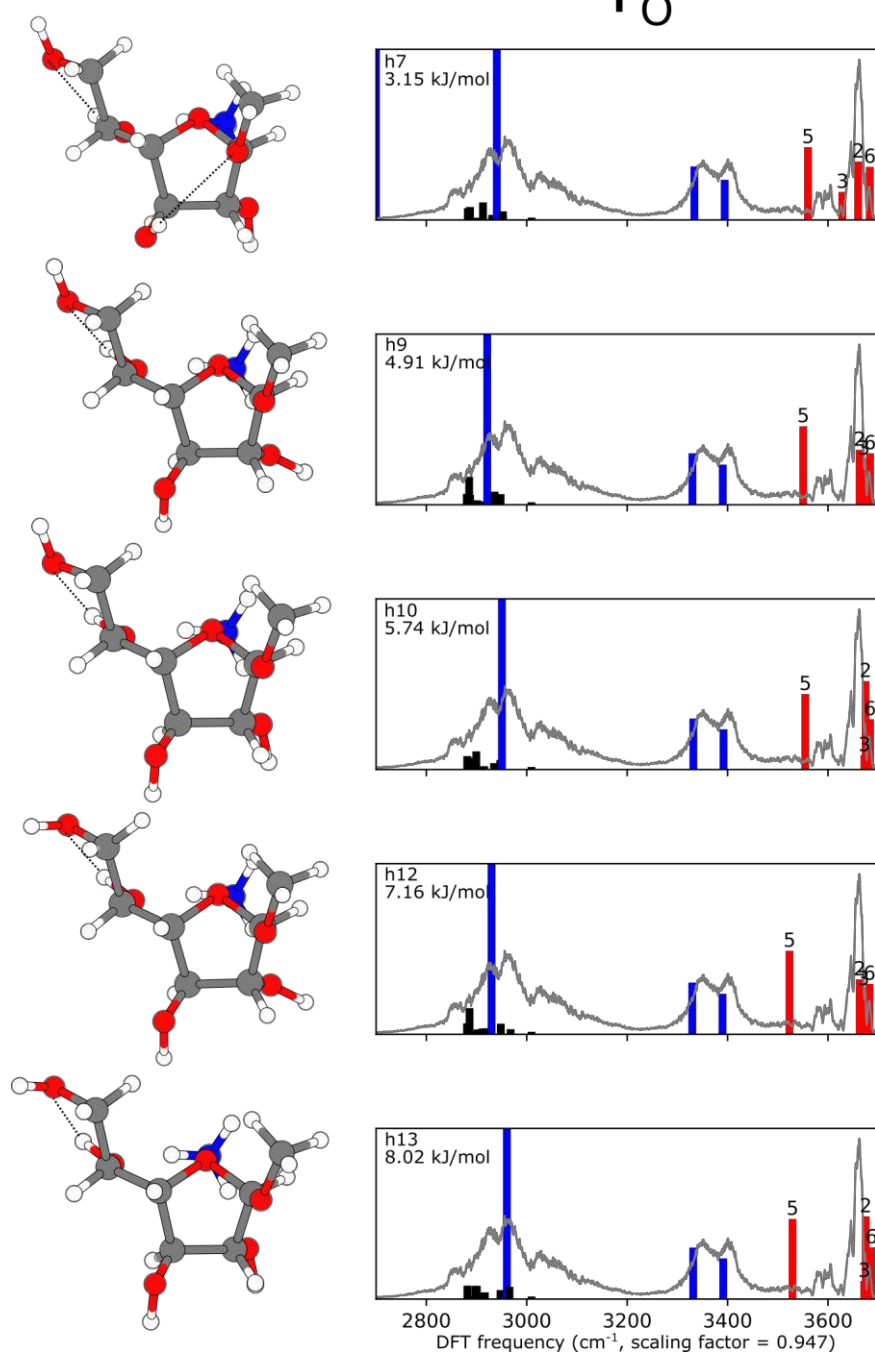

Figure S5 Structures of the most stable conformations for  $\beta$ GalfOMe, gathered according to their geometry type, and their OH (red), NH (blue) and CH (black) vibrational modes compared to the experimental spectrum (grey). The labels indicate the ring OH position. The relative energies are given in reference to the most stable form h1 (only conformers with relative energy under 8.3 kJ/mol are represented). Hydrogen bonds are represented by dotted lines.
